# Supplementary material
Source: Royal Society of Chemistry journal article supplement (doi:10.1039/d6se00294c)
Supplement: d6se00294c1.pdf [file d6se00294c1.pdf]

### Supporting Information

**Table S1** Electrochemical three-electrode systems.

| Electrochemical system (ECS)   | Electrode layout   | Working electrode            | Electrolyte                                      |
|--------------------------------|--------------------|------------------------------|--------------------------------------------------|
| Electrochemical system (ECS1)  | 1 Three-electrode  | CoMoO <sub>4</sub> /NF or NF | 40 mL 1 M KOH                                    |
| Electrochemical system (ECS2)  | 2 Three-electrode  | CoMoO <sub>4</sub> /NF or NF | 40 mL 0.01 M QXL + 1 M KOH                       |
| Electrochemical system (ECS3)  | 3 Three-electrode  | CoMoO <sub>4</sub> /NF       | 40 mL 0.01 M QXL + 1 M KOH + 0.01 M tert-butanol |
| Electrochemical system (ECS4)  | 4 Three-electrode  | CoMoO <sub>4</sub> /NF or NF | 200 mL 0.01 M QXL + 1 M KOH                      |
| Electrochemical system (ECS5)  | 5 Three-electrode  | CoMoO <sub>4</sub> /NF or NF | 40 mL 0.01 M THQXL + 1 M KOH                     |
| Electrochemical system (ECS6)  | 6 Three-electrode  | CoMoO <sub>4</sub> /NF or NF | 200 mL 0.01 M THQXL + 1 M KOH                    |
| Electrochemical system (ECS7)  | 7 Three-electrode  | GC                           | 40 mL 0.01 M QXL + 1 M KOH                       |
| Electrochemical system (ECS12) | 12 Three-electrode | GF                           | 40 mL 0.01 M QXL + 1 M KOH                       |

**Table S2** Electrochemical two-electrode systems in flow batteries.

| Electrochemical system            | Electrode layout                  | Positive electrode and its electrolyte                          | Negative electrode and its electrolyte             |
|-----------------------------------|-----------------------------------|-----------------------------------------------------------------|----------------------------------------------------|
| Electrochemical system 8 (ECS8)   | Two-electrode in flow batteries   | GF, 40 mL 0.1 M K <sub>4</sub> [Fe(CN) <sub>6</sub> ] + 1 M KOH | CoMoO <sub>4</sub> /NF, 40 mL 0.01 M QXL + 1 M KOH |
| Electrochemical system 9 (ECS9)   | Two-electrode in H-type batteries | GF, 40 mL 0.1 M K <sub>4</sub> [Fe(CN) <sub>6</sub> ] + 1 M KOH | CoMoO <sub>4</sub> /NF, 40 mL 0.01 M QXL + 1 M KOH |
| Electrochemical system 10 (ECS10) | Two-electrode in H-type batteries | GF, 40 mL 1 M KOH                                               | CoMoO <sub>4</sub> /NF, 40 mL 1 M KOH              |
| Electrochemical system 11 (ECS11) | Two-electrode in flow batteries   | GF, 40 mL 0.1 M K <sub>4</sub> [Fe(CN) <sub>6</sub> ]           | GF, 40 mL 0.01 M QXL + 1 M KOH                     |

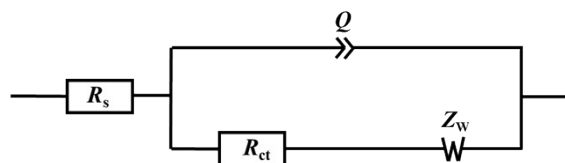

**Fig. S1** EIS equivalent circuit diagram.  $R_s$  is the internal ohmic resistance,  $R_{ct}$  is the charge transfer impedance,  $Q$  is the phase angle element, and  $Z_w$  is the Warburg impedance.

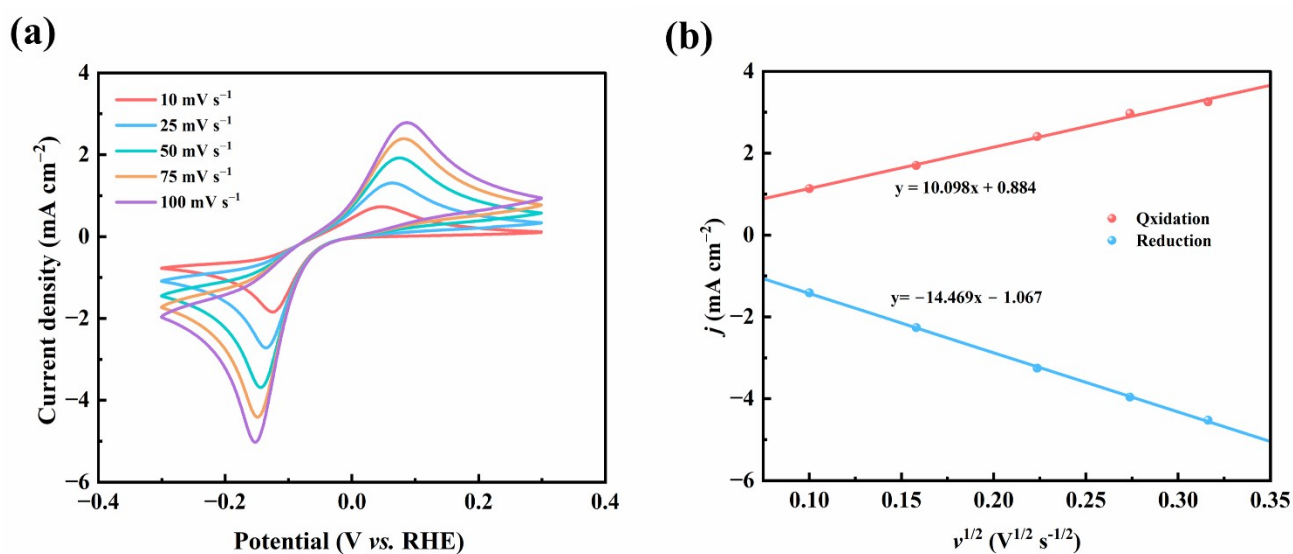

**Fig. S2** (a) CV curves at different scan rates and (b) corresponding  $I_p$ - $v^{0.5}$  curves of the glassy carbon electrode (diameter of 3 mm) in ECS7.

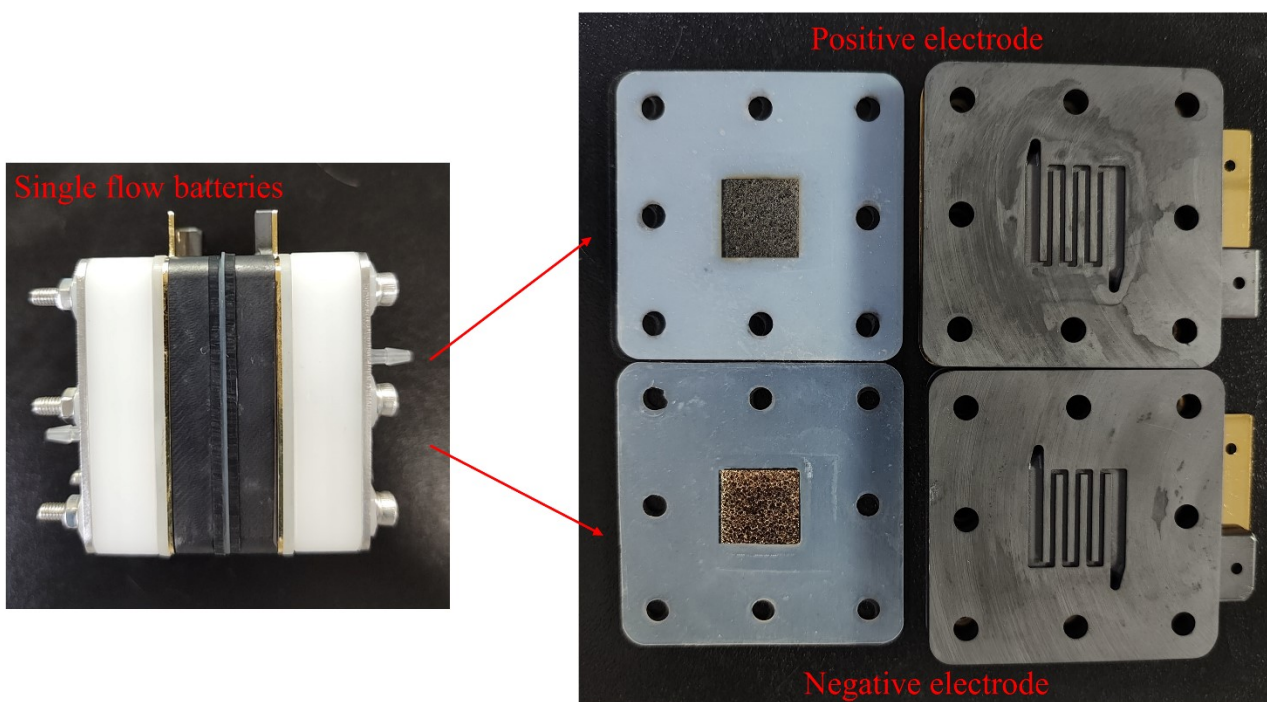

**Fig. S3** Schematic diagram of the flow batteries.

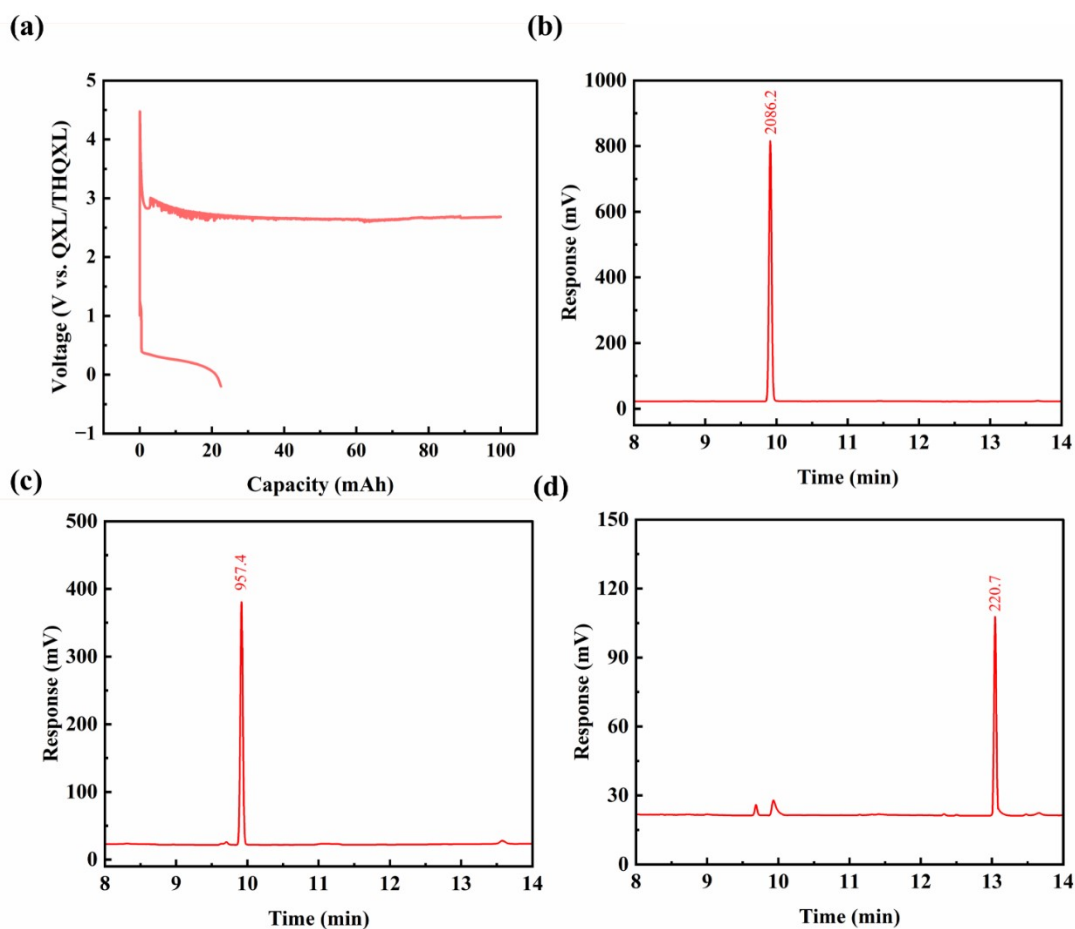

**Fig. S4** (a) GCD profile of 0.01 M QXL||K<sub>4</sub>[Fe(CN)<sub>6</sub>] batteries in ECS9; charging was performed at a current density of 40 mA cm<sup>-2</sup> to a capacity of 100 mAh. GC analysis of the 0.01 M QXL solution (b) before cycling and (c) after 1 cycle. (d) GC analysis of the ethanol solution after ultrasonic treatment of CoMoO<sub>4</sub>/NF cycled once.

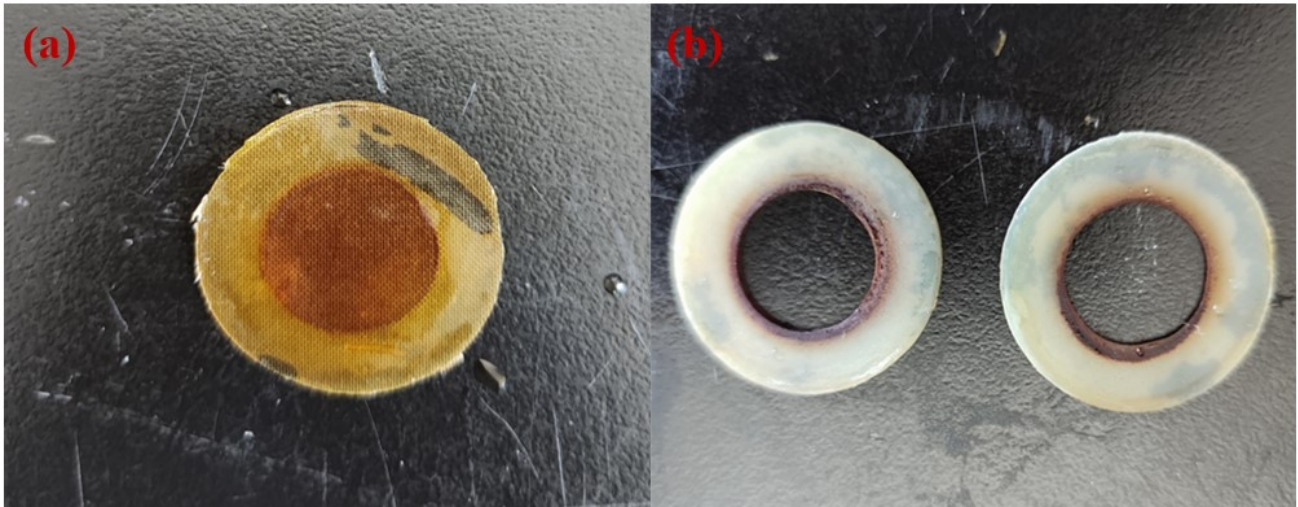

**Fig. S5** State of the (a) membrane and (b) gasket in the H-type batteries after 1 cycle.

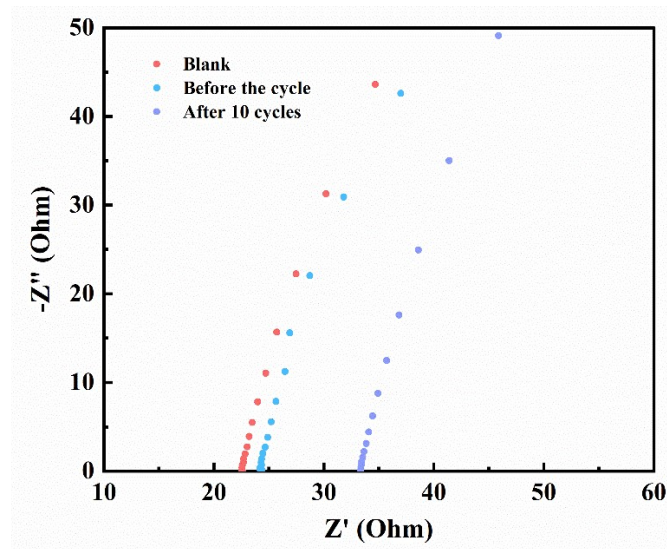

**Fig. S6** Nyquist plots of  $\text{CoMoO}_4/\text{NF}$  as the working electrode in  $0.01 \text{ M QXL}||\text{K}_4[\text{Fe}(\text{CN})_6]$  batteries with ECS9 as a blank control without an ion-exchange membrane and with an ion-exchange membrane before and after 10 cycles.

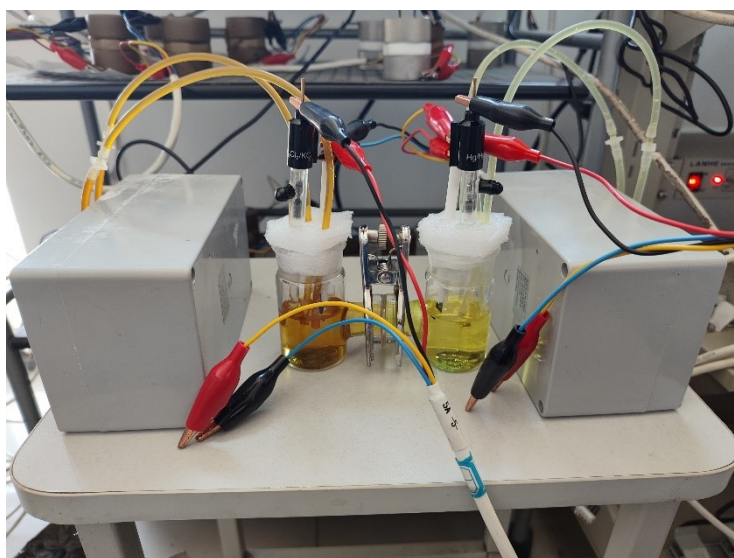

**Fig. S7** Three-electrode H-type battery experimental device with electrolyte driven by a peristaltic pump.

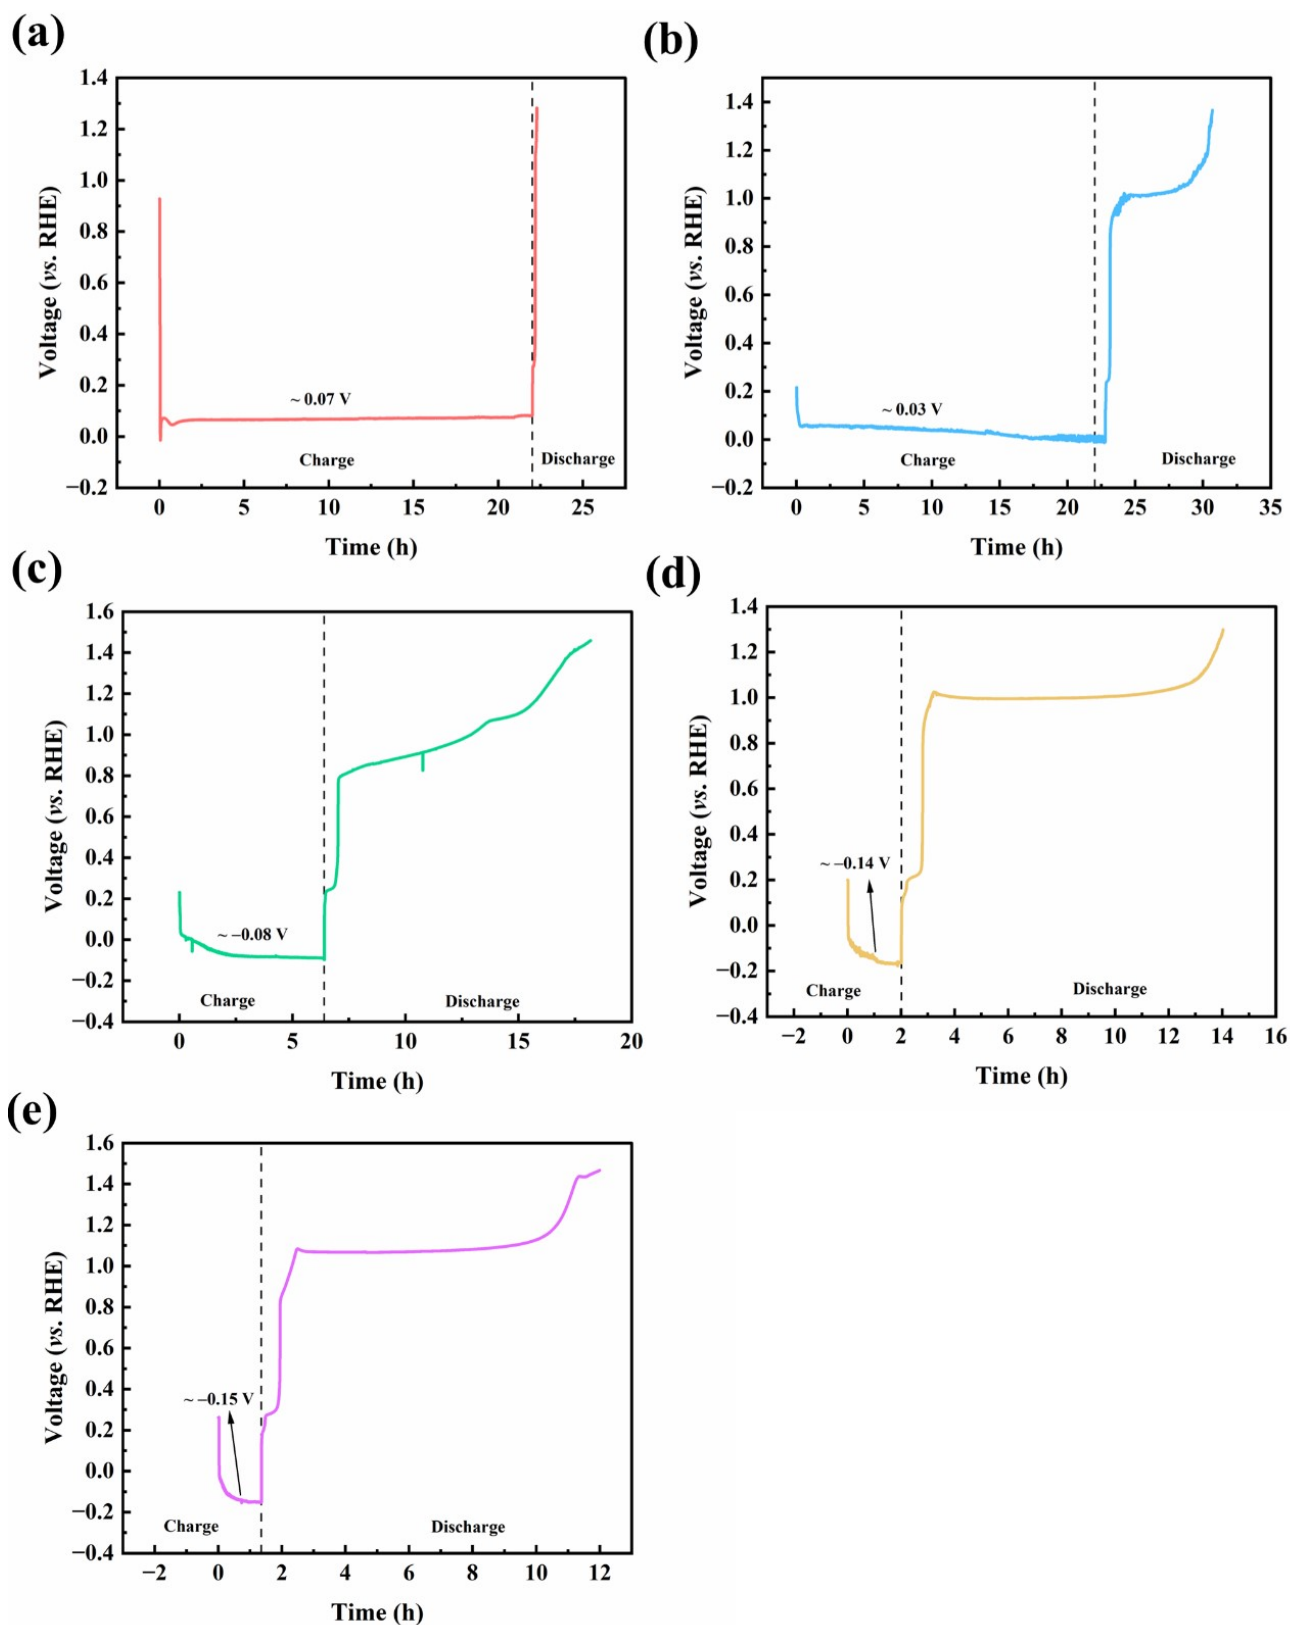

**Fig. S8** Voltage curves of CoMoO<sub>4</sub>/NF as the negative electrode in 0.01 M QXL||K<sub>4</sub>[Fe(CN)<sub>6</sub>] H-type batteries with ECS9; the charging current densities were (a) 2, (b) 5, (c) 20, (d) 40 and (e) 60 mA cm<sup>-2</sup>.

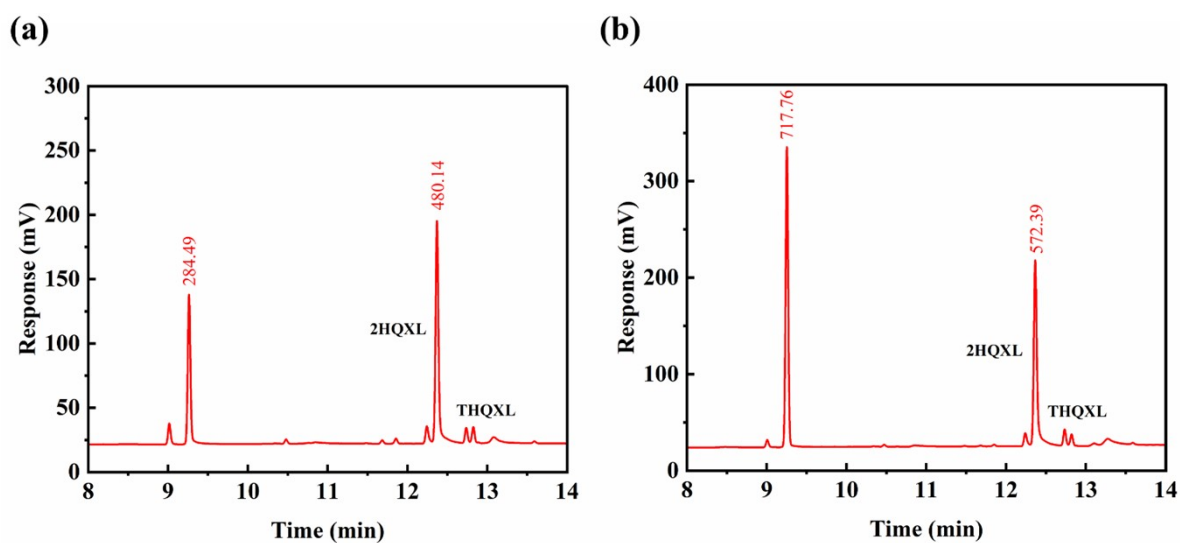

**Fig. S9** GC analysis of 0.01 M QXL||K<sub>4</sub>[Fe(CN)<sub>6</sub>] batteries with ECS8. The batteries were charged at 5 mA cm<sup>-2</sup> to 80 mAh and then discharged at 2 mA cm<sup>-2</sup> to -0.2 V. (a) After charging to 80 mAh and (b) after first charging to 80 mAh and then discharging to -0.2 V.

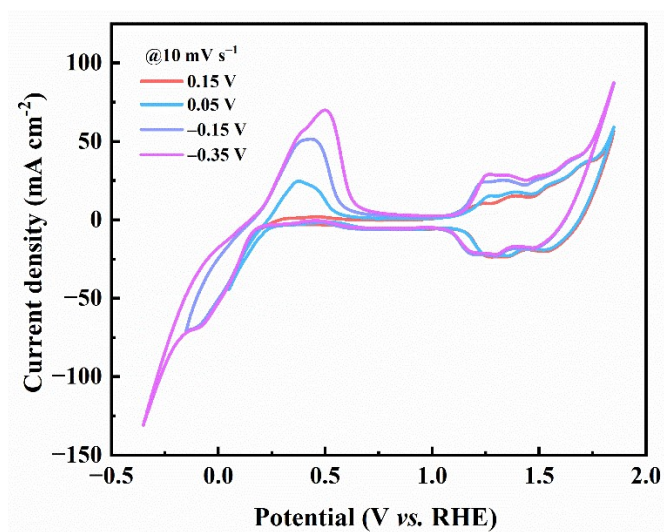

**Fig. S10** CV curves of CoMoO<sub>4</sub>/NF in ECS2 at different potential windows.

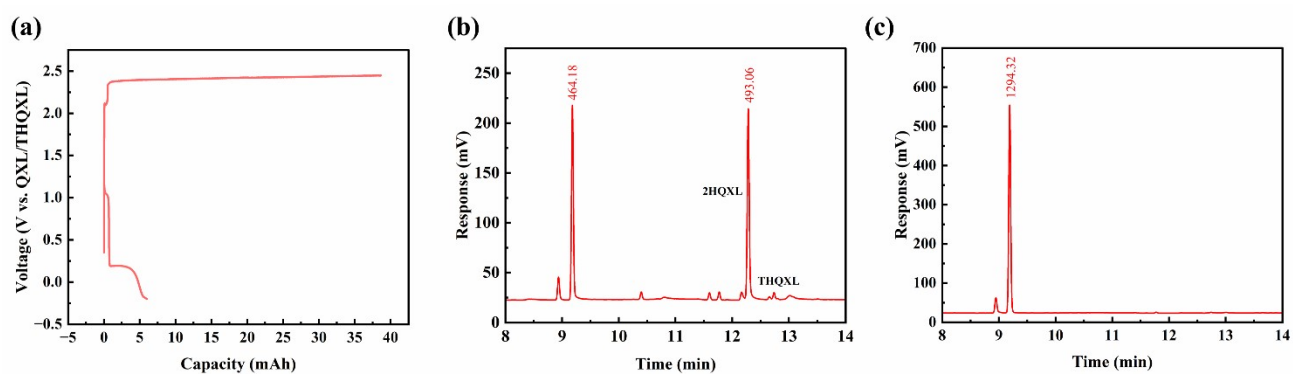

**Fig. S11** (a) GCD test for GF in the QXL||K<sub>4</sub>[Fe(CN)<sub>6</sub>] battery system with ECS11; the charging current density was 20 mA cm<sup>-2</sup>, and the discharging current density was 2 mA cm<sup>-2</sup>. GC test (b) after charging to 40 mAh and (c) after first charging to 40 mAh and then discharging to -0.2 V.

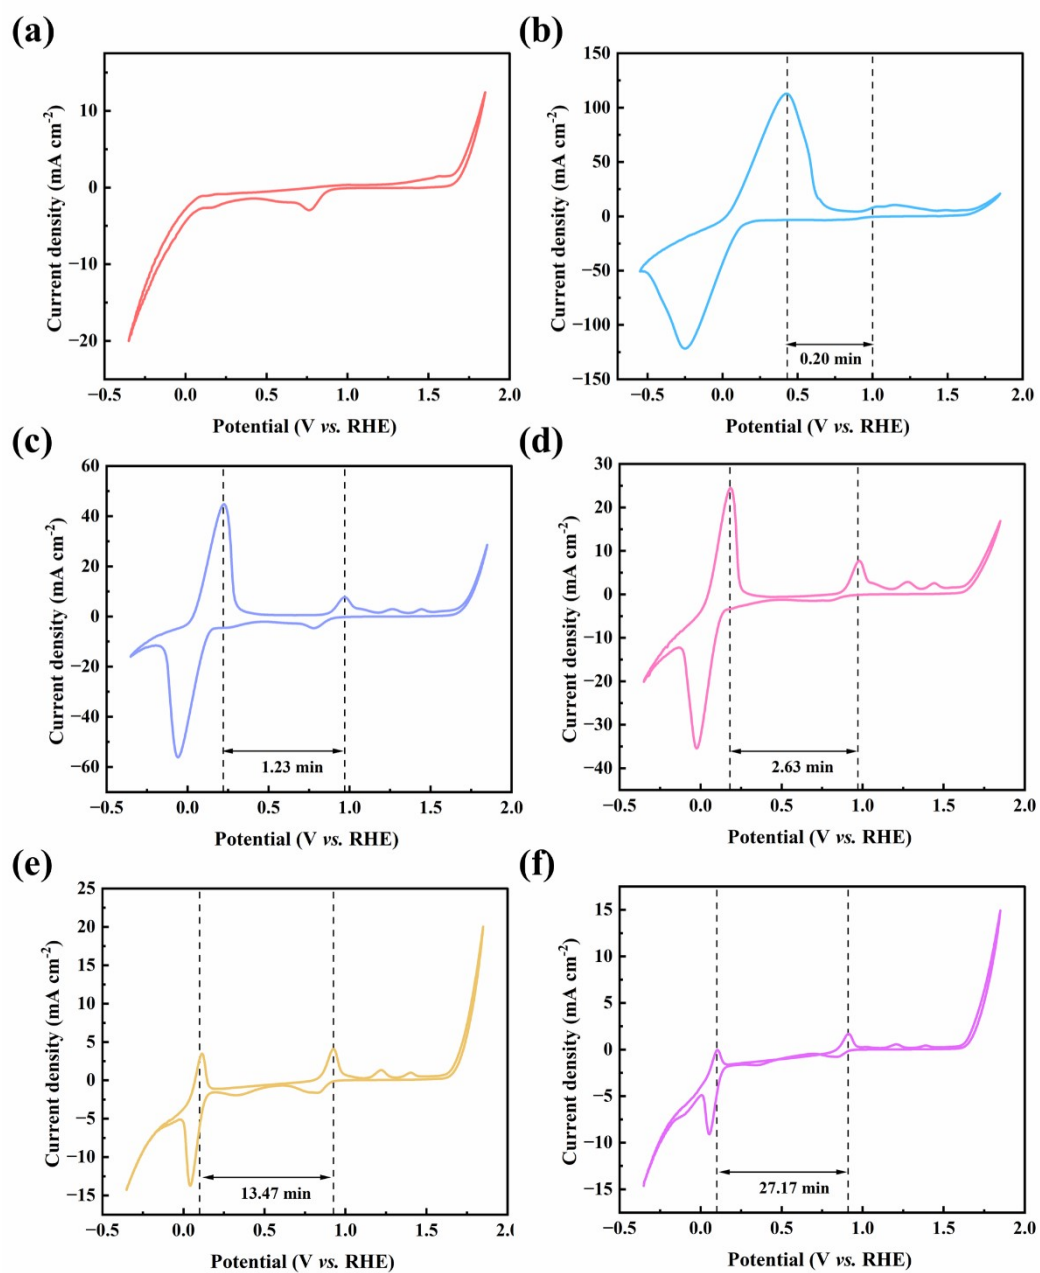

**Fig. S12** (a) CV curves of GF in 1 M KOH within ECS12. CV curves at (b) 50, (c) 10, (d) 5, (e) 1 and (f) 0.5  $\text{mV s}^{-1}$  for GF in 0.01 M QXL + 1 M KOH.

**Table S3** Electrochemical performance of other organic molecule in alkaline aqueous redox flow batteries reported.

| Active substances | Molar mass (g/mol) | Electronic number of reactions | Theoretical of capacity density (mAh g <sup>-1</sup> ) | Concentration of active substances in electrolyte (M) | Cycle number | Ref.             |
|-------------------|--------------------|--------------------------------|--------------------------------------------------------|-------------------------------------------------------|--------------|------------------|
| <b>QXL</b>        | <b>130.1</b>       | <b>4</b>                       | <b>823.7</b>                                           | <b>0.01</b>                                           | <b>10</b>    | <b>This work</b> |
| 2,6-DHAQ          | 240.2              | 2                              | 223.1                                                  | 0.5                                                   | 100          | [1]              |
| DHBQ              | 140.1              | 2                              | 382.6                                                  | 0.5                                                   | 150          | [2]              |
| 1,8-PFP           | 324.4              | 2                              | 165.2                                                  | 1.0                                                   | 53 days      | [3]              |
| 6-QCA             | 174.1              | 2                              | 369.4                                                  | 0.2                                                   | 100          | [4]              |
| DBEP              | 384.4              | 2                              | 139.4                                                  | 0.6                                                   | 1024         | [5]              |
| 2,3-HCNQ          | 218.2              | 2                              | 245.7                                                  | 0.5                                                   | 100          | [6]              |
| BHPC              | 290.1              | 2                              | 184.8                                                  | 0.1                                                   | 1000         | [7]              |

## References

- [1] K. Lin, Q. Chen, M.R. Gerhardt, L. Tong, S.B. Kim, L. Eisenach, A.W. Valle, D. Hardee, R.G. Gordon, M.J. Aziz, M.P. Marshak, Alkaline quinone flow battery, *Science*, 2015, 349, 1529–1532. <https://doi.org/10.1126/science.aab3033>
- [2] Z. Yang, L. Tong, D.P. Tabor, E.S. Beh, M.A. Goulet, D. De Porcellinis, A. Aspuru-Guzik, R.G. Gordon, M.J. Aziz, Alkaline benzoquinone aqueous flow battery for large-scale storage of electrical energy, *Advanced Energy Materials*, 2017, 8, 1702056. <https://doi.org/10.1002/aenm.201702056>
- [3] J. Xu, S. Pang, X. Wang, P. Wang, Y. Ji, Ultrastable aqueous phenazine flow batteries with high capacity operated at elevated temperatures, *Joule*, 2021, 42, 185–192. <https://doi.org/10.1016/j.joule.2021.06.019>
- [4] C. Wang, Y. Wang, M. Tao, B. Yu, K. Zhang, J. Wei, Y. Liu, P. Zhang, G. Ding, Z. Tie, J. Cao, Z. Jin, Highly water-soluble 6-quinoxalinecarboxylic acid for high-voltage aqueous organic redox flow batteries, *ACS Applied Energy Materials*, 2022, 5, 10379–10384. <https://doi.org/10.1021/acsaem.2c01978>
- [5] Y. Liu, P. Zhang, Z. Wu, J. Wei, G. Ding, X. Song, J. Ma, W. Wang, Z. Jin, Screening ultra-stable (phenazine)dioxyalkanocic acids with varied water-solubilizing chain lengths for high-capacity aqueous redox flow batteries, *Journal of the American Chemical Society*, 2024, 146, 3293–3302. <https://doi.org/10.1021/jacs.3c11887>
- [6] C. Wang, Z. Yang, Y. Wang, P. Zhao, W. Yan, G. Zhu, L. Ma, B. Yu, L. Wang, G. Li, J. Liu, Z. Jin, High-performance alkaline organic redox flow batteries based on 2-hydroxy-3-carboxy-1,4-naphthoquinone, *ACS Energy Letters*, 2018, 3, 2404–2409. <https://doi.org/10.1021/acseenergylett.8b01296>
- [7] C. Wang, X. Li, B. Yu, Y. Wang, Z. Yang, H. Wang, H. Lin, J. Ma, G. Li, Z. Jin, Molecular design of fused-ring phenazine derivatives for long-cycling alkaline redox flow batteries, *ACS Energy Letters*, 2020, 5, 411–417. <https://doi.org/10.1021/acseenergylett.9b02676>
